# Supplementary material for: Vaccinating Front-Line Healthcare Workers: Results of a Pre-Pandemic Cross-Sectional Study from North-Eastern Italy on First Responders
Source: MDPI journal article supplement (doi:10.3390/vaccines10091492), 2022-09-07
Supplement: s1 [file s1]

## Supplementary Material

**Table S1. STROBE Statement-Checklist**

| Item No                   |     | Recommendation                                                                                                                                                                                               | Page No |
|---------------------------|-----|--------------------------------------------------------------------------------------------------------------------------------------------------------------------------------------------------------------|---------|
| Title and Abstract        |     |                                                                                                                                                                                                              |         |
| 1                         | (a) | Indicate the study’s design with a commonly used term in the title or the abstract                                                                                                                           | 1       |
|                           | (b) | Provide in the abstract an informative and balanced summary of what was done and what was found                                                                                                              | 1       |
| Introduction              |     |                                                                                                                                                                                                              |         |
| Background/rationale      | 2   | Explain the scientific background and rationale for the investigation being reported                                                                                                                         | 1-2     |
| Objectives                | 3   | State specific objectives, including any prespecified hypotheses                                                                                                                                             | 2       |
| Methods                   |     |                                                                                                                                                                                                              |         |
| Study design              | 4   | Present key elements of study design early in the paper                                                                                                                                                      | 2-3     |
| Setting                   | 5   | Describe the setting, locations, and relevant dates, including periods of recruitment, exposure, follow-up, and data collection                                                                              | 2-3     |
| Participants              | 6   | (a) Give the eligibility criteria, and the sources and methods of selection of participants                                                                                                                  | 2       |
| Variables                 | 7   | Clearly define all outcomes, exposures, predictors, potential confounders, and effect modifiers. Give diagnostic criteria, if applicable                                                                     | 3-4     |
| Data sources/ measurement | 8*  | For each variable of interest, give sources of data and details of methods of assessment (measurement). Describe comparability of assessment methods if there is more than one group                         | 3-4     |
| Bias                      | 9   | Describe any efforts to address potential sources of bias                                                                                                                                                    | 2-4     |
| Study size                | 10  | Explain how the study size was arrived at                                                                                                                                                                    | 2, 3    |
| Quantitative variables    | 11  | Explain how quantitative variables were handled in the analyses. If applicable, describe which groupings were chosen and why                                                                                 | 4       |
| Statistical methods       | 12  | (a) Describe all statistical methods, including those used to control for confounding                                                                                                                        | 4       |
|                           |     | (b) Describe any methods used to examine subgroups and interactions                                                                                                                                          | 4       |
|                           |     | (c) Explain how missing data were addressed                                                                                                                                                                  | 3,4     |
|                           |     | (d) If applicable, describe analytical methods taking account of sampling strategy                                                                                                                           | 4       |
|                           |     | (e) Describe any sensitivity analyses                                                                                                                                                                        | -       |
| Results                   |     |                                                                                                                                                                                                              |         |
| Participants              | 13* | (a) Report numbers of individuals at each stage of study—eg numbers potentially eligible, examined for eligibility, confirmed eligible, included in the study, completing follow-up, and analysed            | 5       |
|                           |     | (b) Give reasons for non-participation at each stage                                                                                                                                                         | 5       |
|                           |     | (c) Consider use of a flow diagram                                                                                                                                                                           | -       |
| Descriptive data          | 14* | (a) Give characteristics of study participants (eg demographic, clinical, social) and information on exposures and potential confounders                                                                     | 5-7     |
|                           |     | (b) Indicate number of participants with missing data for each variable of interest                                                                                                                          | 5       |
| Outcome data              | 15* | Report numbers of outcome events or summary measures                                                                                                                                                         | 9-11    |
| Main results              | 16  | (a) Give unadjusted estimates and, if applicable, confounder-adjusted estimates and their precision (eg, 95% confidence interval). Make clear which confounders were adjusted for and why they were included | 12      |
|                           |     | (b) Report category boundaries when continuous variables were categorized                                                                                                                                    | 12      |
|                           |     | (c) If relevant, consider translating estimates of relative risk into absolute risk for a meaningful time period                                                                                             | -       |
| Other analyses            | 17  | Report other analyses done—eg analyses of subgroups and interactions, and sensitivity analyses                                                                                                               | 8-14    |
| Discussion                |     |                                                                                                                                                                                                              |         |
| Key results               | 18  | Summarise key results with reference to study objectives                                                                                                                                                     | 15      |
| Limitations               | 19  | Discuss limitations of the study, taking into account sources of potential bias or imprecision. Discuss both direction and magnitude of any potential bias                                                   | 16-17   |

|                          |    |                                                                                                                                                                            |           |
|--------------------------|----|----------------------------------------------------------------------------------------------------------------------------------------------------------------------------|-----------|
| Interpretation           | 20 | Give a cautious overall interpretation of results considering objectives, limitations, multiplicity of analyses, results from similar studies, and other relevant evidence | 15-16, 17 |
| Generalisability         | 21 | Discuss the generalisability (external validity) of the study results                                                                                                      | 16-17     |
| <b>Other Information</b> |    |                                                                                                                                                                            |           |
| Funding                  | 22 | Give the source of funding and the role of the funders for the present study and, if applicable, for the original study on which the present article is based              | 18        |

\*Give information separately for exposed and unexposed group.

## **Supplementary material S2.** Author's translation of the Informed Consent.

**Informed Consent.** Estimated participant, the present survey has been developed and shared with the aim to assess the knowledge of First Responders on the topic of Vaccinations and Immunizations on your occupational settings Virus. The present survey has only scientific aims. No economic or similar compensation are guaranteed to the participants.

While we thank you for your cooperation, we stress that web-based surveys must fulfill the requirements represented by the "Helsinki protocol" and EU Regulation 2016/679.

In order to fulfill the requirements of the Helsinki protocol, we're requesting to formally share your consent. Without your consent, the survey will not continue. Even after your consent, you can leave the present survey at any moment, until the sharing of the questionnaire (button "share module" at the end of the questionnaire. Moreover, we stress that the questionnaire will be registered in anonymous form, and in no way it could be associated with the compiler, as we will not retain any specific, individual information (e.g., signature, personal address, etc.). All requested personal data are generic ones, and functional to the demographic analyses (gender, age, etc.).

According to the EU Regulation 2016/279 (GDPR), we also state that:

- 1) data controller, processor, as well as responsible of their retention during the analyses will be Dr. \*\*\*\*\* whom you can ask about the process through his personal email (\*\*\*\*\*). Collected data are generic ones, with SOLE SCIENTIFIC AIMES that have been previously reported. Please be aware that all personal data must be shared with Criminal Law Authorities, without a previous personal consent, in the cases that are specifically reported by the current legal framework, without a specific request, retrieved will not be shared with third parts.
- 2) after the completion of the questionnaire, we cannot identify in any way the compiler; as the questionnaire is totally anonymous by design, we cannot perform any modification, correction of data collected, and their removal as well.
- 3) Data will be retained only for the time strictly required for the aforementioned analyses.
